# Supplementary material for: Structural Insights of Three 2,4-Disubstituted Dihydropyrimidine-5-carbonitriles as Potential Dihydrofolate Reductase Inhibitors
Source: MDPI journal article supplement (doi:10.3390/molecules26113286), 2021-05-29
Supplement: s1 [file s1]

## Supporting Information

# Structural Insights of Three 2,4-Disubstituted Dihydropyrimidine-5-carbonitriles as Potential Dihydrofolate Reductase Inhibitors

Lamya H. Al-Wahaibi<sup>1</sup>, Althaf Shaik<sup>2</sup>, Mohammed A. Elmorsy<sup>3</sup>, Mohammed S. M. Abdelbaky<sup>4</sup>, Santiago Garcia-Granda<sup>4</sup>, Subbiah Thamotharan<sup>5</sup>, Vijay Thiruvengatam<sup>6</sup> and Ali A. El-Emam<sup>7,\*</sup>

## Checkcif report for compound 1

### Datablock

|                                                                                    |                                                 |                    |
|------------------------------------------------------------------------------------|-------------------------------------------------|--------------------|
| Bond precision:                                                                    | C-C = 0.0052 Å                                  | Wavelength=1.54184 |
| Cell:                                                                              | a=12.5792(7)      b=9.5493(5)      c=13.3158(8) |                    |
|                                                                                    | alpha=90      beta=106.432(7)      gamma=90     |                    |
| Temperature: 293 K                                                                 |                                                 |                    |
|                                                                                    | Calculated                                      | Reported           |
| Volume                                                                             | 1534.20(16)                                     | 1534.20(16)        |
| Space group                                                                        | P 21/n                                          | P 21/n             |
| Hall group                                                                         | -P 2yn                                          | -P 2yn             |
| Moiety formula                                                                     | C15 H14 N4 O3 S                                 | C15 H14 N4 O3 S1   |
| Sum formula                                                                        | C15 H14 N4 O3 S                                 | C15 H14 N4 O3 S    |
| Mr                                                                                 | 330.36                                          | 330.36             |
| Dx,g cm-3                                                                          | 1.430                                           | 1.430              |
| Z                                                                                  | 4                                               | 4                  |
| Mu (mm-1)                                                                          | 2.068                                           | 2.068              |
| F000                                                                               | 688.0                                           | 688.0              |
| F000'                                                                              | 691.37                                          |                    |
| h,k,lmax                                                                           | 15,12,16                                        | 15,11,16           |
| Nref                                                                               | 3194                                            | 3194               |
| Tmin,Tmax                                                                          | 0.742,0.848                                     | 0.900,1.000        |
| Tmin'                                                                              | 0.718                                           |                    |
| Correction method= # Reported T Limits: Tmin=0.900 Tmax=1.000 AbsCorr = MULTI-SCAN |                                                 |                    |
| Data completeness= 1.000                                                           | Theta(max)= 75.706                              |                    |
| R(reflections)= 0.0569( 1849)                                                      | wR2(reflections)= 0.1479( 3163)                 |                    |
| S = 1.030                                                                          | Npar= 213                                       |                    |

The following ALERTS were generated. Each ALERT has the format

**test-name\_ALERT\_alert-type\_alert-level.**

Click on the hyperlinks for more details of the test.

### Alert level C

[PLAT242\\_ALERT\\_2\\_C](#) Low 'MainMol' Ueq as Compared to Neighbors of N4 Check  
[PLAT340\\_ALERT\\_3\\_C](#) Low Bond Precision on C-C Bonds ..... 0.00515 Å.

[PLAT906\\_ALERT\\_3\\_C](#) Large K Value in the Analysis of Variance ..... 7.900 Check

**Alert level G**

[PLAT199\\_ALERT\\_1\\_G](#) Reported \_cell\_measurement\_temperature ..... (K) 293 Check  
[PLAT200\\_ALERT\\_1\\_G](#) Reported \_diffn\_ambient\_temperature ..... (K) 293 Check  
[PLAT883\\_ALERT\\_1\\_G](#) No Info/Value for \_atom\_sites\_solution\_primary . Please Do !  
[PLAT912\\_ALERT\\_4\\_G](#) Missing # of FCF Reflections Above STh/L= 0.600 30 Note  
[PLAT941\\_ALERT\\_3\\_G](#) Average HKL Measurement Multiplicity ..... 4.9 Low  
[PLAT978\\_ALERT\\_2\\_G](#) Number C-C Bonds with Positive Residual Density. 0 Info

0 **ALERT level A** = Most likely a serious problem - resolve or explain

0 **ALERT level B** = A potentially serious problem, consider carefully

3 **ALERT level C** = Check. Ensure it is not caused by an omission or oversight

6 **ALERT level G** = General information/check it is not something unexpected

3 ALERT type 1 CIF construction/syntax error, inconsistent or missing data

2 ALERT type 2 Indicator that the structure model may be wrong or deficient

3 ALERT type 3 Indicator that the structure quality may be low

1 ALERT type 4 Improvement, methodology, query or suggestion

0 ALERT type 5 Informative message, check

**Checkcif report for compound 2**

**Datablock**

Bond precision: C-C = 0.0080 A Wavelength=1.54184

Cell: a=18.3676(7) b=5.7996(2) c=31.8592(12)

alpha=90 beta=95.343(4) gamma=90

Temperature: 293 K

|                | Calculated      | Reported         |
|----------------|-----------------|------------------|
| Volume         | 3379.1(2)       | 3379.0(2)        |
| Space group    | C 2/c           | C 2/c            |
| Hall group     | -C 2yc          | -C 2yc           |
| Moiety formula | C16 H16 N4 O3 S | C16 H16 N4 O3 S1 |
| Sum formula    | C16 H16 N4 O3 S | C16 H16 N4 O3 S  |
| Mr             | 344.39          | 344.39           |
| Dx,g cm-3      | 1.354           | 1.354            |
| Z              | 8               | 8                |
| Mu (mm-1)      | 1.899           | 1.899            |
| F000           | 1440.0          | 1440.0           |
| F000'          | 1446.88         |                  |
| h,k,lmax       | 22,7,40         | 22,7,40          |
| Nref           | 3516            | 3516             |
| Tmin,Tmax      | 0.898,0.916     | 0.871,1.000      |
| Tmin'          | 0.732           |                  |

Correction method= # Reported T Limits: Tmin=0.871 Tmax=1.000 AbsCorr =  
MULTI-SCAN

Data completeness= 1.000 Theta(max)= 75.711

R(reflections)= 0.0766( 1660) wR2(reflections)= 0.2358( 3418)

S = 0.998 Npar= 211

The following ALERTS were generated. Each ALERT has the format

**test-name\_ALERT\_alert-type\_alert-level.**

Click on the hyperlinks for more details of the test.

#### ● Alert level C

[PLAT026\\_ALERT\\_3\\_C](#) Ratio Observed / Unique Reflections (too) Low .. 47% Check  
[PLAT220\\_ALERT\\_2\\_C](#) NonSolvent Resd 1 C Ueq(max)/Ueq(min) Range 3.9 Ratio  
[PLAT234\\_ALERT\\_4\\_C](#) Large Hirshfeld Difference C6 --C7 . 0.16 Ang.  
[PLAT242\\_ALERT\\_2\\_C](#) Low 'MainMol' Ueq as Compared to Neighbors of N4 Check  
[PLAT242\\_ALERT\\_2\\_C](#) Low 'MainMol' Ueq as Compared to Neighbors of C6 Check  
[PLAT340\\_ALERT\\_3\\_C](#) Low Bond Precision on C-C Bonds ..... 0.008 Ang.  
[PLAT906\\_ALERT\\_3\\_C](#) Large K Value in the Analysis of Variance ..... 8.039 Check  
[PLAT906\\_ALERT\\_3\\_C](#) Large K Value in the Analysis of Variance ..... 2.153 Check  
[PLAT911\\_ALERT\\_3\\_C](#) Missing FCF Refl Between Thmin & STh/L= 0.600 7 Report

#### ● Alert level G

[PLAT002\\_ALERT\\_2\\_G](#) Number of Distance or Angle Restraints on AtSite 3 Note  
[PLAT171\\_ALERT\\_4\\_G](#) The CIF-Embedded .res File Contains EADP Records 2 Report  
[PLAT172\\_ALERT\\_4\\_G](#) The CIF-Embedded .res File Contains DFIX Records 2 Report  
[PLAT176\\_ALERT\\_4\\_G](#) The CIF-Embedded .res File Contains SADI Records 2 Report  
[PLAT199\\_ALERT\\_1\\_G](#) Reported \_cell\_measurement\_temperature ..... (K) 293 Check  
[PLAT200\\_ALERT\\_1\\_G](#) Reported \_diffrn\_ambient\_temperature ..... (K) 293 Check  
[PLAT860\\_ALERT\\_3\\_G](#) Number of Least-Squares Restraints ..... 2 Note  
[PLAT883\\_ALERT\\_1\\_G](#) No Info/Value for \_atom\_sites\_solution\_primary . Please Do !  
[PLAT912\\_ALERT\\_4\\_G](#) Missing # of FCF Reflections Above STh/L= 0.600 91 Note  
[PLAT933\\_ALERT\\_2\\_G](#) Number of OMIT Records in Embedded .res File ... 8 Note  
[PLAT941\\_ALERT\\_3\\_G](#) Average HKL Measurement Multiplicity ..... 4.9 Low  
[PLAT978\\_ALERT\\_2\\_G](#) Number C-C Bonds with Positive Residual Density. 1 Info

0 **ALERT level A** = Most likely a serious problem - resolve or explain

0 **ALERT level B** = A potentially serious problem, consider carefully

9 **ALERT level C** = Check. Ensure it is not caused by an omission or oversight

12 **ALERT level G** = General information/check it is not something unexpected

3 ALERT type 1 CIF construction/syntax error, inconsistent or missing data

6 ALERT type 2 Indicator that the structure model may be wrong or deficient

7 ALERT type 3 Indicator that the structure quality may be low

5 ALERT type 4 Improvement, methodology, query or suggestion

0 ALERT type 5 Informative message, check

### Checkcif report for compound 3

#### Datablock

|                    |                  |                    |
|--------------------|------------------|--------------------|
| Bond precision:    | C-C = 0.0036 A   | Wavelength=1.54184 |
| Cell:              | a=7.1456(4)      | b=10.8642(6)       |
|                    | alpha=104.672(5) | beta=108.159(5)    |
|                    |                  | gamma=95.421(5)    |
| Temperature: 293 K |                  |                    |
|                    | Calculated       | Reported           |
| Volume             | 788.84(9)        | 788.84(8)          |
| Space group        | P -1             | P -1               |

|                |                       |                       |
|----------------|-----------------------|-----------------------|
| Hall group     | -P 1                  | -P 1                  |
| Moiety formula | C15 H15 N3 O2 S, H2 O | C15 H15 N3 O2 S, H2 O |
| Sum formula    | C15 H17 N3 O3 S       | C15 H17 N3 O3 S       |
| Mr             | 319.38                | 319.38                |
| Dx,g cm-3      | 1.345                 | 1.345                 |
| Z              | 2                     | 2                     |
| Mu (mm-1)      | 1.968                 | 1.968                 |
| F000           | 336.0                 | 336.0                 |
| F000'          | 337.63                |                       |
| h,k,lmax       | 8,13,14               | 8,13,13               |
| Nref           | 3264                  | 3265                  |
| Tmin,Tmax      | 0.754,0.821           | 0.966,1.000           |
| Tmin'          | 0.571                 |                       |

Correction method= # Reported T Limits: Tmin=0.966 Tmax=1.000 AbsCorr =  
MULTI-SCAN

Data completeness= 1.000                      Theta(max)= 75.547  
R(reflections)= 0.0432( 2299)                      wR2(reflections)= 0.1210( 3220)  
S = 1.035                      Npar= 212

The following ALERTS were generated. Each ALERT has the format

**test-name\_ALERT\_alert-type\_alert-level.**

Click on the hyperlinks for more details of the test.

#### Alert level C

[PLAT241\\_ALERT\\_2\\_C](#) High 'MainMol' Ueq as Compared to Neighbors of      C8 Check  
[PLAT906\\_ALERT\\_3\\_C](#) Large K Value in the Analysis of Variance .....      2.891 Check

#### Alert level G

[PLAT002\\_ALERT\\_2\\_G](#) Number of Distance or Angle Restraints on AtSite      3 Note  
[PLAT154\\_ALERT\\_1\\_G](#) The s.u.'s on the Cell Angles are Equal ..(Note)      0.005 Degree  
[PLAT172\\_ALERT\\_4\\_G](#) The CIF-Embedded .res File Contains DFIX Records      2 Report  
[PLAT199\\_ALERT\\_1\\_G](#) Reported \_cell\_measurement\_temperature ..... (K)      293 Check  
[PLAT200\\_ALERT\\_1\\_G](#) Reported \_diffn\_ambient\_temperature ..... (K)      293 Check  
[PLAT860\\_ALERT\\_3\\_G](#) Number of Least-Squares Restraints .....      2 Note  
[PLAT883\\_ALERT\\_1\\_G](#) No Info/Value for \_atom\_sites\_solution\_primary .      Please Do !  
[PLAT912\\_ALERT\\_4\\_G](#) Missing # of FCF Reflections Above STh/L= 0.600      37 Note  
[PLAT933\\_ALERT\\_2\\_G](#) Number of OMIT Records in Embedded .res File ...      1 Note  
[PLAT941\\_ALERT\\_3\\_G](#) Average HKL Measurement Multiplicity .....      3.8 Low  
[PLAT978\\_ALERT\\_2\\_G](#) Number C-C Bonds with Positive Residual Density.      2 Info

0 **ALERT level A** = Most likely a serious problem - resolve or explain

0 **ALERT level B** = A potentially serious problem, consider carefully

2 **ALERT level C** = Check. Ensure it is not caused by an omission or oversight

11 **ALERT level G** = General information/check it is not something unexpected

4 ALERT type 1 CIF construction/syntax error, inconsistent or missing data

4 ALERT type 2 Indicator that the structure model may be wrong or deficient

3 ALERT type 3 Indicator that the structure quality may be low

2 ALERT type 4 Improvement, methodology, query or suggestion

0 ALERT type 5 Informative message, check
